# Supplementary material for: Quorum-Quenching Bacteria Isolated From Red Sea Sediments Reduce Biofilm Formation by Pseudomonas aeruginosa
Source: PubMed Central journal article supplement (PMC6057113; doi:10.3389/fmicb.2018.01354), 2018-07-17
Supplement: Image_1.pdf [file Image_1.pdf]

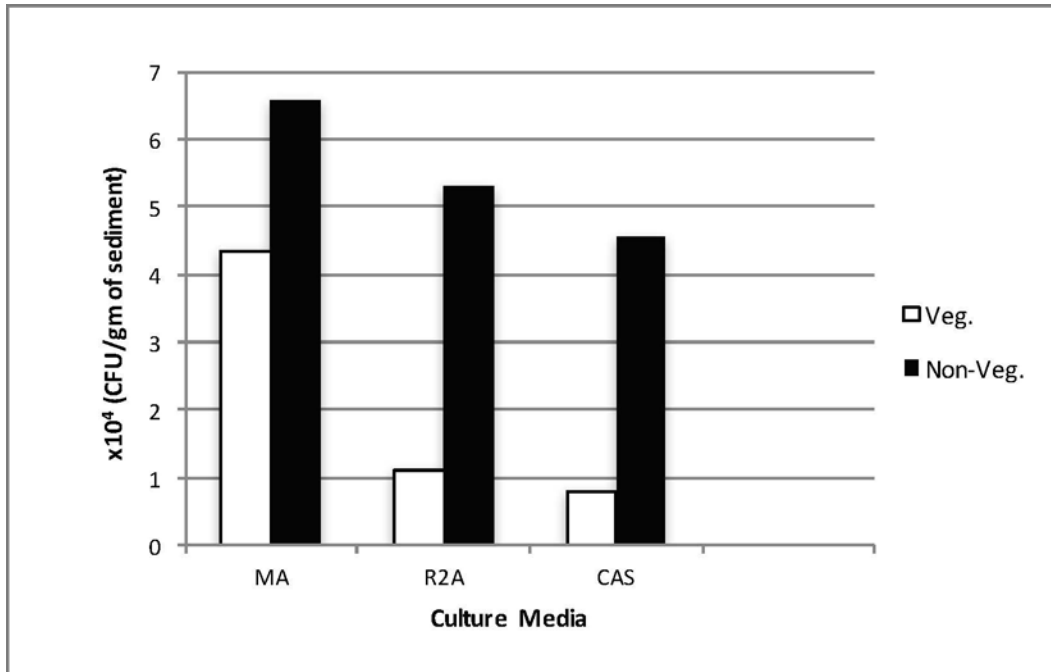

Supp. Figure 1. **Total CFUs per gram of sea sediment**

The total number of CFU obtained from 1 gram of sea sediment on different culture media are shown. White bars represent vegetative samples and black bars represent non-vegetative sea sediment samples. MA represents marine agar and CAS denotes Casamino acid agar.
